# Supplementary material for: Response of biological productivity to North Atlantic marine front migration during the Holocene
Source: Copernicus journal article supplement (doi:10.5194/cp-17-379-2021), 2021-02-08
Supplement: Supplementary file 1 [file cp-17-379-2021-supplement.pdf]

Supplement of *Clim. Past*, 17, 379–396, 2021  
<https://doi.org/10.5194/cp-17-379-2021-supplement>  
© Author(s) 2021. This work is distributed under  
the Creative Commons Attribution 4.0 License.

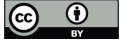

*Supplement of*

## **Response of biological productivity to North Atlantic marine front migration during the Holocene**

**David J. Harning et al.**

*Correspondence to:* David J. Harning ([david.harning@colorado.edu](mailto:david.harning@colorado.edu))

The copyright of individual parts of the supplement might differ from the CC BY 4.0 License.

**Table S1:** Marine sediment core proxy records from Iceland's insular shelves.

| Marine core             | Time Interval (ka BP) | Proxies                                                                                                  | Reference                      |
|-------------------------|-----------------------|----------------------------------------------------------------------------------------------------------|--------------------------------|
| MD99-2269               | 10 to 0               | diatoms                                                                                                  | Andersen et al. (2004)         |
| MD99-2269               | 10 to 0               | coccolithophores, CaCO <sub>3</sub> , low-resolution benthic foram.                                      | Giraudeau et al. (2004)        |
| MD99-2269               | 11.5 to 0             | CaCO <sub>3</sub> , quartz                                                                               | Moros et al. (2006)            |
| MD99-2269               | 10 to 0               | dinocysts                                                                                                | Solignac et al. (2006)         |
| MD99-2269               | 4 to 0                | Mg/Ca of benthic foram.                                                                                  | Kristjánsdóttir et al. (2007a) |
| MD99-2269               | 12 to 0               | tephra                                                                                                   | Kristjánsdóttir et al. (2007b) |
| MD99-2269               | 12 to 0               | PSV age model                                                                                            | Stoner et al. (2007)           |
| MD99-2269               | 11.5 to 0             | diatoms                                                                                                  | Justwan et al. (2008)          |
| MD99-2269               | 8 to 0                | IP <sub>25</sub> , HBI III, <i>T. quinqueloba</i> , <i>N. pachyderma</i> (s)                             | Cabedo-Sanz et al. (2016)      |
| MD99-2269               | 11.4 to 0.4           | Mg/Ca and δ <sup>18</sup> O of benthic and planktic foram., δ <sup>13</sup> C planktic foram., alkenones | Kristjánsdóttir et al. (2017)  |
| <hr/>                   |                       |                                                                                                          |                                |
| JR51-GC35               | 10.2 to 0             | <sup>14</sup> C chronology, alkenones                                                                    | Bendle & Rosell-Melé (1997)    |
| JR51-GC35 and MD99-2264 | 12 to 0               | minerology                                                                                               | Andrews et al. (2014)          |
| JR51-GC35               | 8 to 0                | HBI, planktic foraminifera                                                                               | Cabedo-Sanz et al. (2016)      |
| <hr/>                   |                       |                                                                                                          |                                |
| MD99-2275               | 1.2 to 0              | IP <sub>25</sub>                                                                                         | Massé et al. (2008)            |
| MD99-2275               | 2 to 0                | diatoms                                                                                                  | Jiang et al. (2005)            |
| MD99-2275 and -2271     | 2 to 0                | dinocysts, benthic and planktic foram. and δ <sup>18</sup> O, diatoms, sedimentology                     | Eiríksson et al. (2006)        |
| MD99-2275               | 2 to 0                | alkenones                                                                                                | Sicre et al. (2008a)           |
| MD99-2275               | 4.5 to 0              | alkenones, magnetics                                                                                     | Sicre et al. (2008b)           |
| B05-2006-MC04           | 0.13 to 0             | benthic and planktic foram., diatoms, IRD                                                                | Knudsen et al. (2009)          |
| MD99-2275               | 2 to 0                | alkenones                                                                                                | Sicre et al. (2011)            |
| MD99-2275               | 15 to 0               | tephra                                                                                                   | Gudmundsdóttir et al. (2012)   |
| MD99-2275               | 1 to 0                | benthic and planktic foram. and δ <sup>18</sup> O                                                        | Knudsen et al. (2012)          |
| MD99-2275               | 9.3 to 0              | diatoms                                                                                                  | Jiang et al. (2015)            |
| <hr/>                   |                       |                                                                                                          |                                |
| HM107-04 and -05        | 14 to 0               | grain size, minerology, MS, water content, CaCO <sub>3</sub> , benthic and planktic foram., tephra       | Eiríksson et al. (2000a)       |
| HM107-03                | 4.5 to 0              | benthic and planktic foram., grain size, IRD, tephra                                                     | Eiríksson et al. (2000b)       |
| HM107-03                | 4.6 to 0              | diatoms                                                                                                  | Jiang et al. (2002)            |
| HM107-04 and -05        | 15.8 to 0             | benthic and planktic foram. and δ <sup>18</sup> O, diatoms                                               | Knudsen et al. (2004a)         |

|                             |             |                                                                                                            |                              |
|-----------------------------|-------------|------------------------------------------------------------------------------------------------------------|------------------------------|
| HM107-03 and -02, MD99-2275 | 1.2 to 0    | benthic and planktic foram. and $\delta^{18}\text{O}$ , diatoms, IRD                                       | Knudsen et al. (2004b)       |
| MD99-2264 and B997 cores    | 36 to 0     | IRD, $\text{CaCO}_3$ , MS                                                                                  | Geirsdóttir et al. (2002)    |
| MD99-2256 and -2264         | 11.5 to 0   | benthic foram. and $\delta^{18}\text{O}$                                                                   | Ólafsdóttir et al. (2012)    |
| MD99-2266                   | 10.6 to 0.5 | $\delta^{18}\text{O}$ of benthic foram., $\text{CaCO}_3$ , MS, grain size, carbonate, IRD                  | Quillmann et al. (2010)      |
| MD99-2266                   | 8.4 to 7.6  | Mg/Ca and $\delta^{18}\text{O}$ of benthic foram., $\text{CaCO}_3$                                         | Quillmann et al. (2012)      |
| MD99-2266                   | 10.7 to 0.3 | C, N, GDGTs, alkenones, <i>n</i> -alkanes                                                                  | Moossen et al. (2013)        |
| MD99-2266                   | 10.7 to 0.3 | GDGTs, alkenones, <i>n</i> -alkanes and $\delta\text{D}$                                                   | Moossen et al. (2015)        |
| MD99-2263                   | 2 to 0      | grain size, magnetics, minerology, benthic and planktic foram and $\delta^{18}\text{O}$ , $\text{IP}_{25}$ | Andrews et al. (2009)        |
| MD99-2263                   | 12 to 0     | minerology, IRD, $\text{CaCO}_3$ , $\text{IP}_{25}$                                                        | Darby et al. (2017)          |
| MD99-2271, -2272, -2275     | 4.5 to 0    | grain size, C, MS, water content, $\text{CaCO}_3$ , benthic and planktic foram., tephra                    | Knudsen & Eiríksson (2002)   |
| MD99-2271, -2273, -2275     | 4.5 to 0    | tephra and $^{14}\text{C}$                                                                                 | Eiríksson et al. (2004)      |
| MD99-2273                   | 0.9 to 0.5  | alkenones, $\text{IP}_{25}$                                                                                | Sicre et al. (2013)          |
| MD99-2272                   | 15 to 4     | $\text{IP}_{25}$ , HBI III, sterols, <i>n</i> -alkanols, tephra                                            | Xiao et al. (2017)           |
| B997 cores                  | <45         | $^{14}\text{C}$                                                                                            | Andrews et al. (2000)        |
| B997 cores                  | 4 to 0      | MS, $\text{CaCO}_3$ , grain size, pollen                                                                   | Andrews et al. (2001a)       |
| B997 cores                  | 5 to 0      | $\text{CaCO}_3$                                                                                            | Andrews et al. (2001b)       |
| B997 cores                  | 10.2        | tephra, magnetics                                                                                          | Andrews et al. (2002a)       |
| B997 cores                  | 36 to 0     | grain size, IRD, density, MS, magnetics, C, $\text{CaCO}_3$                                                | Andrews et al. (2002b)       |
| B997 cores                  | 10 to 0     | coccolithophores, $\text{CaCO}_3$                                                                          | Andrews & Giraudeau (2003)   |
| B997 cores                  | 44 to 0     | grain size, density, MS, foram., tephra                                                                    | Andrews & Helgadóttir (2003) |
| B997 cores                  | 14 to 0     | benthic and planktic foram and $\delta^{18}\text{O}$                                                       | Castaneda et al. (2004)      |
| B997 cores                  | 10 to 0     | benthic and planktic foram and $\delta^{18}\text{O}$                                                       | Smith et al. (2005)          |
| B997 cores                  | 2 to 0      | minerology                                                                                                 | Andrews & Eberl (2007)       |
| B997 cores                  | 12 to 0     | PSV                                                                                                        | Andrews et al. (2008)        |
| B997 cores                  | 12 to 0     | minerology                                                                                                 | Andrews (2009)               |
| B997 cores                  | 0.8 to 0    | quartz, $\text{CaCO}_3$ , $\text{IP}_{25}$ , HBI III, GDGTs                                                | Harning et al. (2019)        |

|                          |                                    |                                                                                                                 |                        |
|--------------------------|------------------------------------|-----------------------------------------------------------------------------------------------------------------|------------------------|
| KN 158-4-72GGC (Djúpall) |                                    | carbonate, grain size, minerology                                                                               | Andresen et al. (2005) |
| 93030-006 LCF            | 12.7 to 9.4 ( $^{14}\text{C}$ yrs) | grain size, IRD, C, $\text{CaCO}_3$ , MS, benthic and planktic foram., tephra                                   | Jennings et al. (2000) |
| 93030-03BC               | 0.4 to 0                           | C, minerology, magnetics, $\text{CaCO}_3$ , planktic foram. and $\delta^{18}\text{O}$ and $\delta^{13}\text{C}$ | Jennings et al. (2001) |

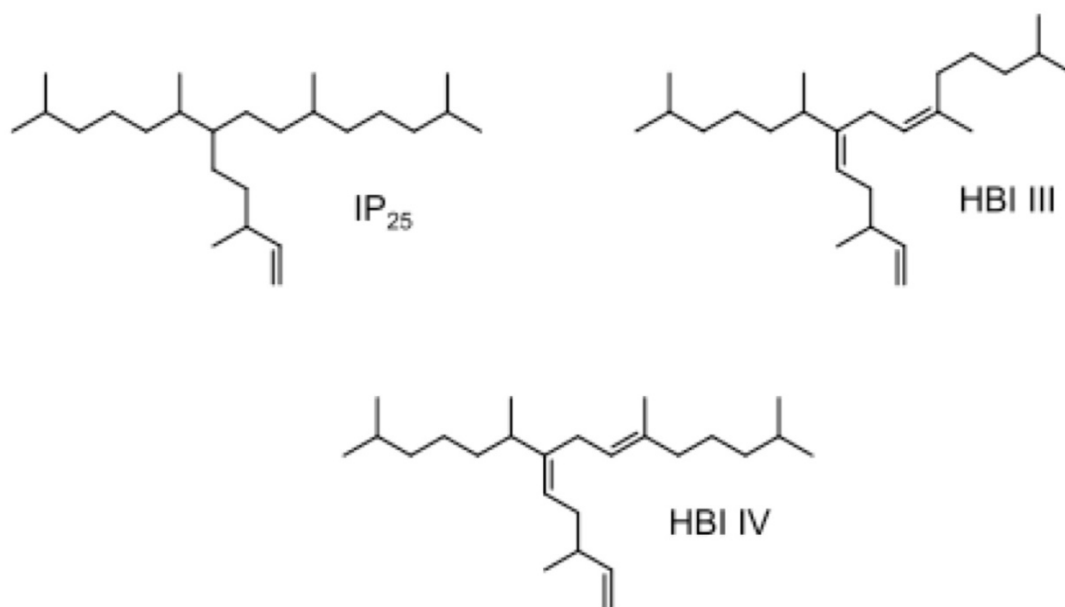

**Fig. S1:** Structures of highly branched isoprenoid (HBI) biomarkers discussed in the current study.

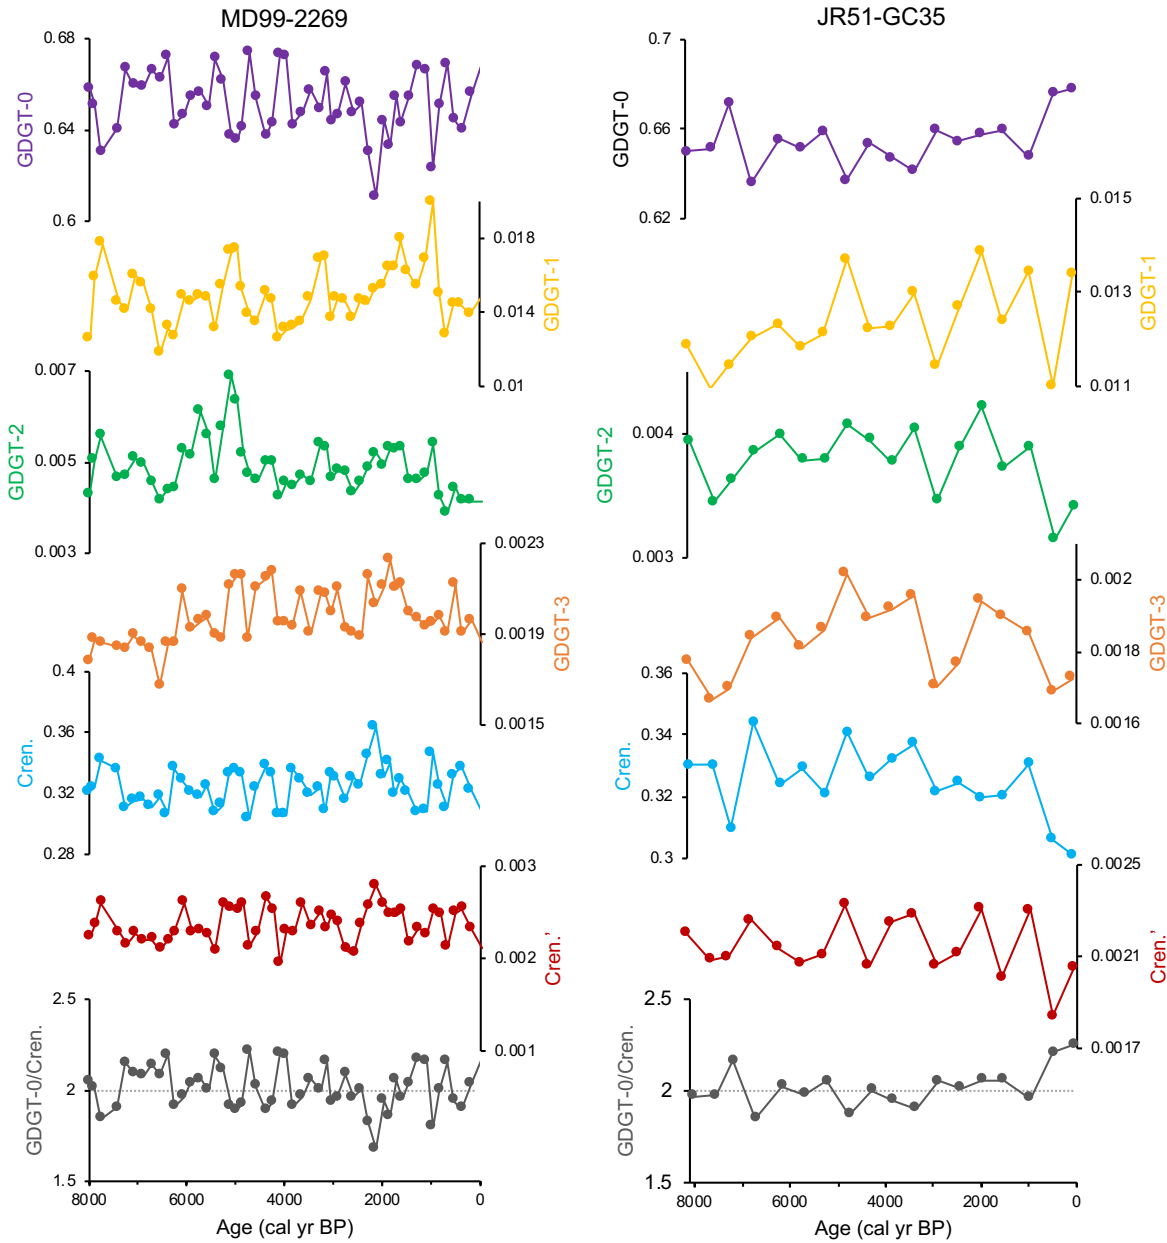

**Fig. S2: Fractional abundances of individual GDGTs and GDGT-0/crenarchaeol ratios for MD99-2269 (left) and JR51-GC35 (right).** GDGT-0/crenarchaeol values around and below 2 (grey dotted line) indicate that the GDGT pool is not altered by methanogenic contributors (e.g. Blaga et al., 2009).

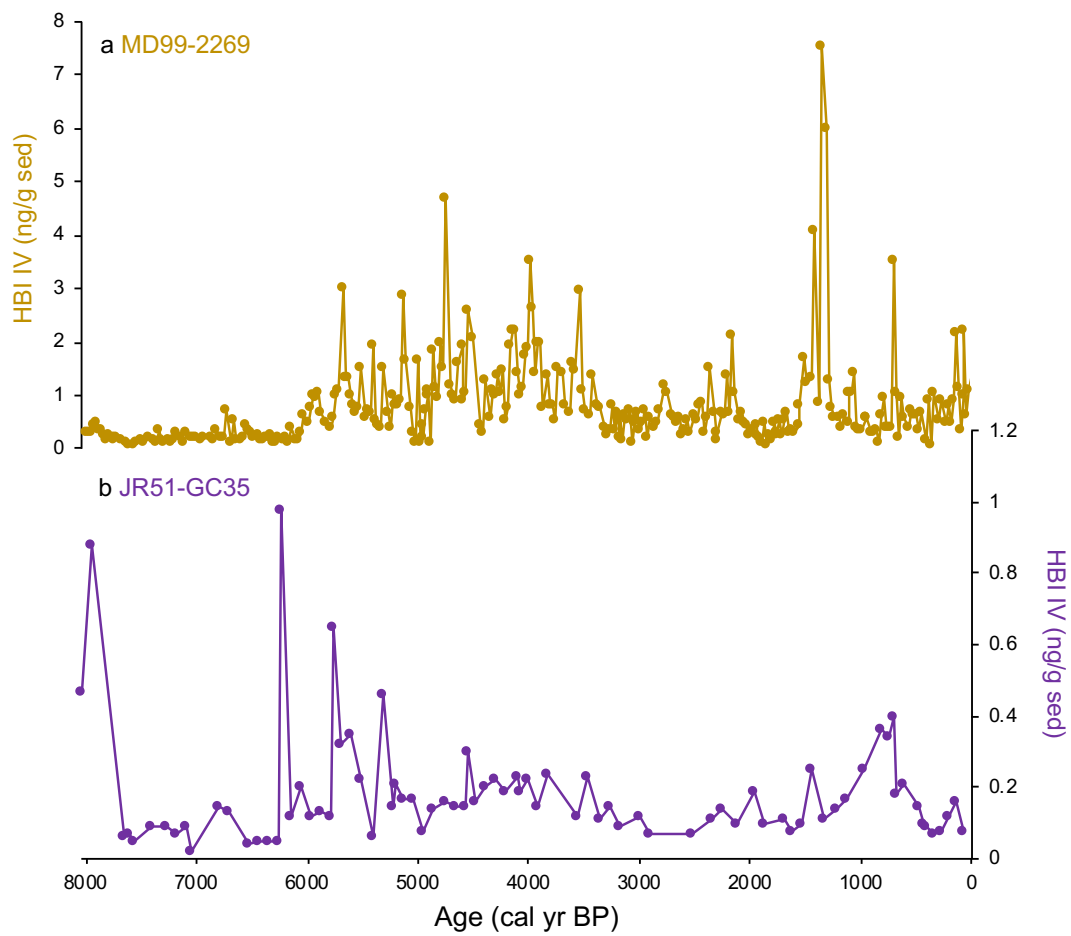

**Fig. S3:** Downcore HBI IV records from a) MD99-2269 and b) JR51-GC35.

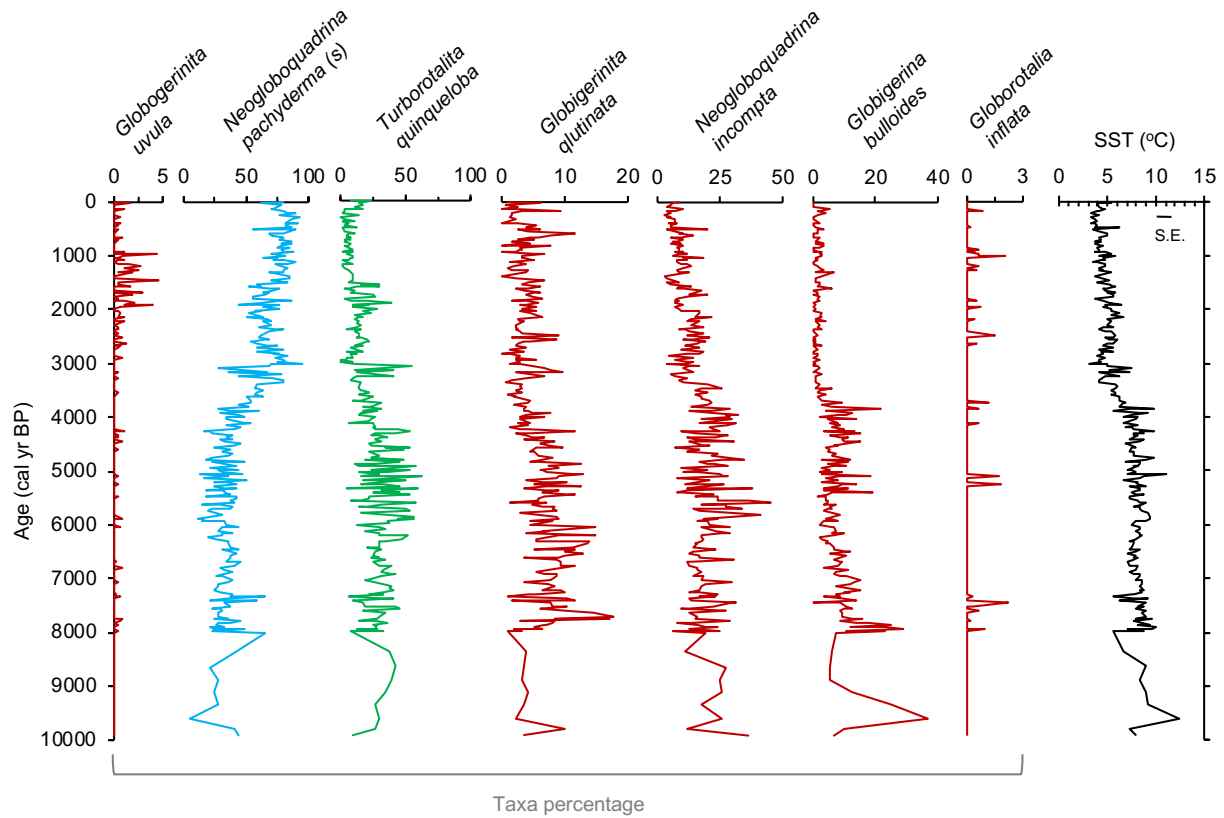

**Fig. S4: Planktic foraminiferal species in MD99-2269 used to estimate summer SSTs over the last 10 ka BP, with emphasis on high-resolution estimates for the past 8 cal ka BP. Colors indicate environmental preferences: red=Atlantic Water species, blue=Arctic, green=frontal species.**

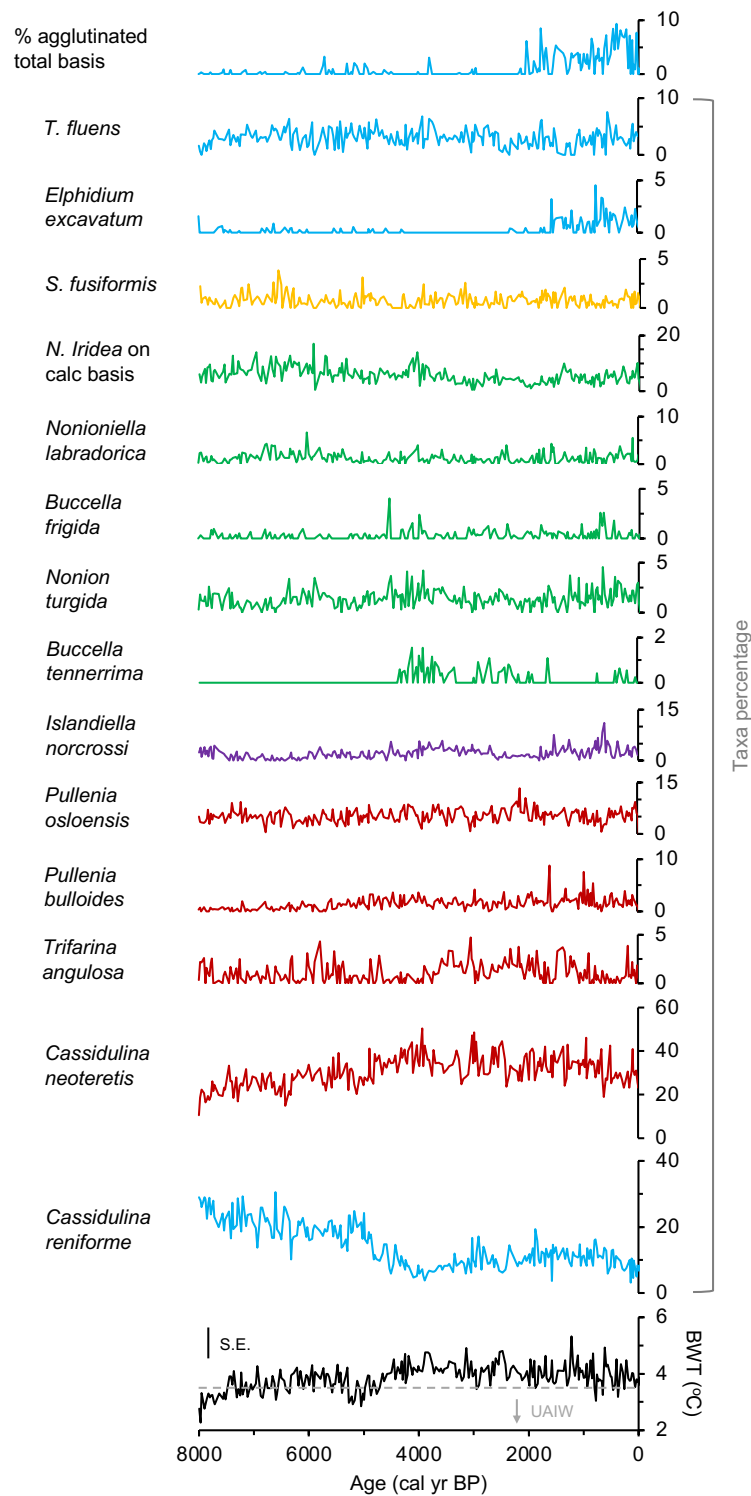

**Fig S5: Select benthic species used to estimate BWT in MD99-2269 over the last 8 cal ka BP.** Species colors indicate environmental preferences: red=Atlantic; blue=Arctic, purple=mixed Atlantic Water, green=productivity, yellow=indifferent.



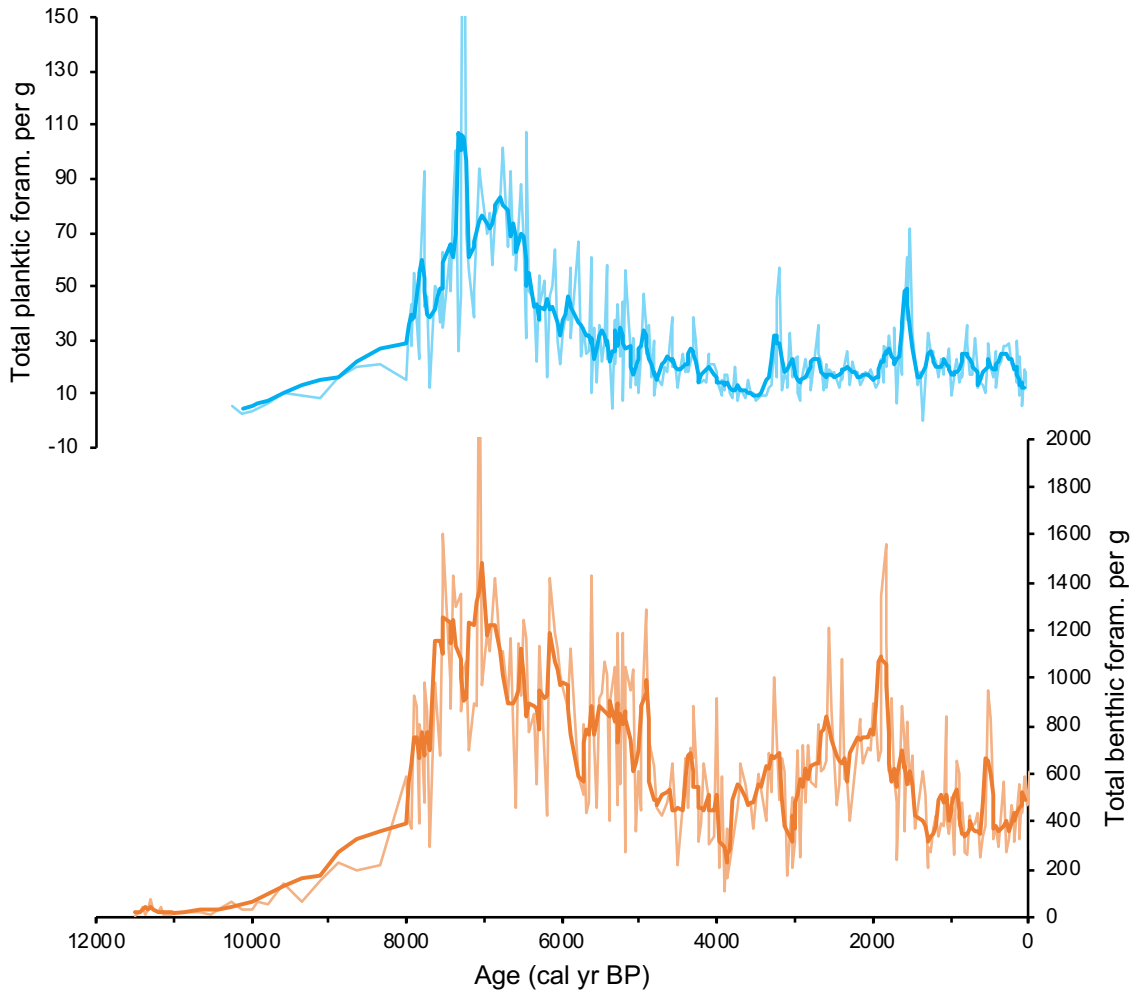

**Fig. S6:** Downcore records from MD99-2269 for planktic and benthic foraminifera per gram. Bold line is a 5-pt running mean.

## References

- Andersen, C., Koç, N., Jennings, A.E., and Andrews, J.T.: Nonuniform response of the major surface currents in the Nordic Seas to insolation forcing: Implications for the Holocene climate variability. *Paleoceanography*, 19, 1-16, 2004.
- Andresen, C.S., Bond, G., Kuijpers, A., Knutz, P.C., and Björck, S.: Holocene climate variability at multidecadal time scales detected by sedimentological indicators in a shelf core NW off Iceland. *Mar. Geol.*, 214, 323–338, 2005.
- Andrews, J.T.: Seeking a Holocene drift ice proxy: non-clay mineral variations from the SW to N-central Iceland shelf: trends, regime shifts, and periodicities. *J. Quat. Sci.*, 24, 664–676, 2009.
- Andrews, J.T., Belt, S.T., Olafsdottir, S., Massé, G., and Vare, L.L.: Sea ice and marine climate variability for NW Iceland/Denmark Strait over the last 2000 cal. yr BP. *Holocene*, 19, 775–784, 2009.
- Andrews, J.T., Bigg, G.R., and Wilton, D.J.: Holocene ice-rafting and sediment transport from the glaciated margin of East Greenland (67–70°N) to the N Iceland shelves: detecting and modelling changing sediment sources. *Quat. Sci. Rev.*, 91, 204–217, 2014.
- Andrews, J.T., Caseldine, C., Weiner, N.J., and Hatton, J.: Late Quaternary (ca. 4 ka) marine and terrestrial environmental change in Reykharfjörður, north Iceland: climate and/or settlement? *J. Quat. Sci.*, 16, 133–144, 2001a.
- Andrews, J.T., and Eberl, D.D.: Quantitative mineralogy of surface sediments on the Iceland shelf, and application to down-core studies of Holocene ice-rafted sediments. *J. Sediment. Res.*: 77, 469–479, 2007
- Andrews, J.T., Geirsdóttir, Á., Hardardóttir, J., Principato, S., Grönvold, K., Kristjánsdóttir, G.B., Helgadóttir, G., Drexler, J., and Sveinbjörnsdóttir, A.E.: Distribution, sediment magnetism and geochemistry of the Saksunarvatn (10 180 ± 60 cal. yr BP) tephra in marine, lake, and terrestrial sediments, northwest Iceland. *J. Quat. Sci.*, 17, 731–745, 2002a
- Andrews, J.T., and Giraudeau, J.: Multi-proxy records showing significant Holocene environmental variability on the inner North Iceland Shelf (Hunafloi). *Quat. Sci. Rev.*, 22, 175–193, 2003.
- Andrews, J.T., Hardardóttir, J., Geirsdóttir, Á., and Helgadóttir, G.: Late Quaternary ice extent and depositional history from the Djúpall trough, off the Vestfirðir peninsula, north-west Iceland: A stacked 36 cal environmental record. *Polar Res.*, 21, 211–226, 2002b.
- Andrews, J.T., Harðardóttir, J., Helgadóttir, G., Jennings, A.E., Geirsdóttir, Á., Sveinbjörnsdóttir, Á.E., Schoolfield, S., Kristjánsdóttir, G.B., Smith, L.M., Thors, K., and Syvitski, J.: The N and W Iceland Shelf: insights into Last Glacial Maximum ice extent and deglaciation based on acoustic stratigraphy and basal radiocarbon AMS dates. *Quat. Sci. Rev.*, 19, 619–631, 2000.
- Andrews, J.T., Hardardóttir, J., Stoner, J.S., and Principato, S.: Holocene sediment magnetic properties along a transect from Ísafjarðardjúp to Djúpall, Northwest Iceland. *Arct., Antarct., Alp. Res.*, 40, 1–14, 2008.
- Andrews, J.T., and Helgadóttir, G.: Late Quaternary ice cap extent and deglaciation, Húnaflóaáall, Northwest Iceland: Evidence from marine cores. *Arct., Antarct., Alp. Res.*, 35, 218–232, 2003.
- Andrews, J.T., Helgadóttir, G., Geirsdóttir, A., and Jennings, A.E.: Multi-century-scale records of carbonate (hydrographic?) variability on the N. Iceland margin over the last 5000 years. *Quat. Res.*, 56, 199–206, 2001b.
- Andrews, J.T., Kihl, R., Kristjansdottir, G.B., Smith, L.M., Helgadóttir, G., Geirsdóttir, A., and Jennings, A.E.: Holocene sediment properties of the East Greenland and Iceland continental shelves bordering Denmark strait (64°–68°N), North Atlantic. *Sedimentology*, 49, 5–24, 2002b

- Bendle, J.A.P., and Rosell-Melé, A.: High-resolution alkenone sea surface temperature variability on the North Icelandic Shelf: implications for Nordic Seas palaeoclimatic development during the Holocene. *Holocene*, 17, 9-24, 2007.
- Blaga, C.I., Reichart, G.-J., Heiri, O., and Sinninghe Damsté, J.S.: Tetraether membrane lipid distribution in water-column particulate matter and sediments: A study from 47 European lakes along a north-south transect. *J. Paleolimnol.*, 41, 535–540, 2009.
- Cabedo-Sanz, P., Belt, S.T., Jennings, A.E., Andrews, J.T., and Geirsdóttir, Á.: Variability in drift ice export from the Arctic Ocean to the North Icelandic Shelf over the last 8000 years: A multi-proxy evaluation. *Quat. Sci. Rev.*, 146, 99-115, 2016.
- Castañeda, I.S., Smith, L.M., Kristjánssdóttir, G.B., and Andrews, J.T.: Temporal changes in Holocene  $\delta^{18}\text{O}$  records from northwest and central North Iceland Shelf. *J. Quat. Sci.*, 19, 321-334, 2004.
- Darby, D.A., Andrews, J.T., Belt, S.T., Jennings, A.E., and Cabedo-Sanz, P.: Holocene cyclic records of ice-rafted debris and sea ice variations on the East Greenland and Northwest Iceland margins. *Arct., Antarct., Alp. Res.*, 49, 649-672, 2017.
- Eiríksson, J., Bartels-Jonsdóttir, H.B., Cage, A.G., Gudmundsdóttir, E.R., Klitgaard-Kistensen, D., Marret, F., Rodrigues, T., Abrantes, F., Austin, W.E.N., Jiang, H., Knudsen, K.L., and Sejrup, H.P.: Variability of the North Atlantic current during the last 2000 years based on shelf bottom water and sea surface temperatures along an open ocean/shallow marine transect in western Europe. *Holocene*, 16, 1017–1019, 2006.
- Eiríksson, J., Knudsen, K.L., Haflidason, H., and Henriksen, P.: Late-glacial and Holocene palaeoceanography of the North Icelandic Shelf. *J. Quat. Sci.*, 15, 23-42, 2002a.
- Eiríksson, J., Knudsen, K.L., Haflidason, H., and Heinemeier, J.: Chronology of late Holocene climatic events in the northern North Atlantic based on AMS  $^{14}\text{C}$  dates and tephra markers from the volcano Hekla, Iceland. *J. Quat. Sci.*, 15, 573-580, 2002b.
- Eiríksson, J., Larsen, G., Knudsen, K.L., Heinemeier, J., and Símonarson, L.A.: Marine reservoir age variability and water mass distribution in the Iceland Sea. *Quat. Sci. Rev.*, 23, 2247-2268, 2004.
- Geirsdóttir, Á., Andrews, J.T., Ólafsdóttir, S., Helgadóttir, G., and Harðardóttir, J.: A 36 Ky record of iceberg rafting and sedimentation from north-west Iceland. *Polar Res.*, 21, 291–298, 2002.
- Giraudeau, J., Jennings, A.E., and Andrews, J.T.: Timing and mechanisms of surface and intermediate water circulation changes in the Nordic Sea over the last 10000 cal years: A view from the North Iceland Shelf. *Quat. Sci. Rev.*, 23, 2127-2139, 2004.
- Gudmundsdóttir ER, Larsen G, and Eiríksson, J.: Tephra stratigraphy on the North Icelandic shelf: extending tephrochronology into marine sediments off North Iceland. *Boreas*, 41, 719–734, 2012.
- Harning, D.J., Andrews, J.T., Belt, S.T., Cabedo-Sanz, P., Geirsdóttir, Á., Dildar, N., Miller, G.H., and Sepúlveda, J.: Sea ice control on winter subsurface temperatures of the North Iceland Shelf during the Little Ice Age: A TEX<sub>86</sub> calibration case study. *Paleoceanogr. Paleoclimatol.*, 34, 1006-2021, 2019.
- Jennings, A.E., Hagen, S., Harðardóttir, J., Stein, R., Ogilvie, A.E.J., and Jonsdóttir, I.: Oceanographic change and terrestrial human impacts in a post A.D. 1400 sediment record from the southwest Iceland shelf. *Clim. Chang.*, 48, 83-100, 2001.
- Jennings, A., Syvitski, J., Gerson, L., Grönvold, K., Geirsdóttir, Á., Harðardóttir, J., Andrews, J., and Hagen, S.: Chronology and paleoenvironments during the late Weichselian deglaciation of the southwest Iceland shelf. *Boreas*, 29, 167-183, 2000.

- Jiang, H., Eiriksson, J., Schultz, M., and Knudsen, K.L., Seidenkrantz, M.S.: Evidence for solar forcing of sea surface temperature on the North Icelandic Shelf during the late Holocene. *Geology*, 33, 73–76, 2005.
- Jiang, H., Seidenkrantz, M.S., Eiriksson, J., and Knudsen, K.L.: Late-Holocene summer sea-surface temperature based on a diatom record from the north Iceland shelf. *Holocene*, 137-147, 2002.
- Jiang, H., Muscheler, R., Björck, S., Seidenkrantz, M.-S., Olsen, J., Sha, L., Sjolte, J., Eiriksson, J., Ran., L., Knudsen, K.-L., and Knudsen, M.F.: Solar forcing of Holocene summer sea-surface temperatures in the northern North Atlantic. *Geology*, 43, 2-5, 2015.
- Justwan, A., Koc, N., and Jennings, A.E.: Evolution of the Irminger and East Icelandic Current systems through the Holocene, revealed by diatom-based sea surface temperature reconstructions. *Quat. Sci. Rev.*, 27, 1571-1582, 2008.
- Knudsen, K.L., Jiang, H., Jansen, E., Eiriksson, J., Heinemeier, J., and Seidenkrantz, M.S.: Environmental changes off North Iceland during the deglaciation and the Holocene: foraminifera, diatoms and stable isotopes. *Mar. Micropaleontol.*, 50, 273–305, 2004a.
- Knudsen, K.L., and Eiriksson, J.: Application of tephrochronology to the timing and correlation of palaeoceanographic events records in Holocene and Late Glacial shelf sediments off North Iceland. *Mar. Geol.*, 191, 165-188, 2002.
- Knudsen, K.L., Eiriksson, J., and Bartels-Jónsdóttir, H.B.: Oceanographic changes through the last millennium off North Iceland: Temperature and salinity reconstructions based on foraminifera and stable isotopes. *Mar. Micropaleontol.*, 84-85, 54-73, 2012.
- Knudsen, K.L., Eiriksson, J., Jansen, E., Jiang, H., Rytter, F., and Gudmundsdottir, E.R.: Palaeoceanographic changes off North Iceland through the last 1200 years: foraminifera, stable isotopes, diatoms and ice rafted debris. *Quat. Sci. Rev.*, 23, 2231–2246, 2004b.
- Knudsen, K.L., Eiriksson, J., Jiang, H., and Jónsdóttir, I.: Paleoceanography and climate changes off North Iceland during the last millennium: comparison of foraminifera, diatoms and ice-rafted debris with instrumental and documentary data. *J. Quat. Sci.*, 24, 457-468, 2009.
- Kristjánisdóttir, G.B., Lea, D.W., Jennings, A.E., Pak, D.K., and Belanger, C.: New spatial Mg/Ca-temperature calibrations for three Arctic, benthic foraminifera and reconstruction of north Iceland shelf temperature for the past 4000 years. *Geochem., Geophys., Geosyst.*, 8, 1-27, 2007a
- Kristjánisdóttir, G.B., Stoner, J.S., Jennings, A.E., Andrews, J.T., and Grönvold, K.: Geochemistry of Holocene cryptotephra from the North Iceland Shelf (MD99-2269): intercalibration with radiocarbon and palaeomagnetic chronostratigraphies. *Holocene*, 17, 155-176, 2007b.
- Kristjánisdóttir, G.B., Moros, M., Andrews, J.T., and Jennings, A.E.: Holocene Mg/Ca, alkenones, and light stable isotope measurements on the outer North Iceland shelf (MD99-2269): A comparison with other multi-proxy data and sub-division of the Holocene. *Holocene*, 26, 55-62, 2017.
- Massé, G., Rowland, S.J., Sicre, M.-A., Jacob, J., Jansen, E., and Belt, S.T.: Abrupt climate changes for Iceland during the last millennium: Evidence from high resolution sea ice reconstructions. *Earth Planet. Sci. Lett.*, 269, 565-569, 2008.
- Moossen, H., Abell, R., Quillmann, U., and Bendle, J.: Holocene changes in marine productivity and terrestrial organic carbon inputs into an Icelandic fjord: Application of molecular and bulk organic proxies. *Holocene*, 23, 1699-1710, 2013..
- Moossen, H., Bendle, J., Seki, O., Quillmann, U., and Kawamura, K.: North Atlantic Holocene climate evolution recorded by high-resolution terrestrial and marine biomarker records. *Quat. Sci. Rev.*, 129, 111-127, 2015.

- Moros, M., Andrews, J.T., Eberl, D.D., and Jansen, E.: Holocene history of drift ice in the northern North Atlantic: Evidence for differential spatial and temporal modes. *Paleoceanography*, 21, 1-10, 2006.
- Ólafsdóttir, S., Jennings, A.E., Geirsdóttir, Á., Andrews, J., and Miller, G.H.: Holocene variability of the North Atlantic Irminger currents on the south- and northwest shelf of Iceland. *Mar. Micropaleontol.*, 77, 101-118, 2010.
- Quillmann, U., Jennings, A., and Andrews, J.: Reconstructing Holocene palaeoclimate and palaeoceanography in Ísafjarðardjúp, northwest Iceland, from two fjord records overprinted by relative sea-level and local hydrographic changes. *J. Quat. Sci.*, 25, 1144-1159, 2010.
- Quillmann, U., Marchitto, T.M., Jennings, A.E., Andrews, J.T., and Friestad, B.F.: Cooling and freshening at 8.2 ka on the NW Iceland Shelf recorded in paired  $\delta^{18}\text{O}$  and Mg/Ca measurements of the benthic foraminifer *Cibicides lobatulus*. *Quat. Res.*, 78, 528, 539, 2012.
- Sicre, M.-A., Hall, I.R., Mignot, J., Khodri, M., Ezat, U., Truong, M.-X., Eiriksson, J., and Knudsen, K.-L.: Sea surface temperature variability in the subpolar Atlantic over the last two millennia. *Paleoceanography*, 26, 1-10, 2011.
- Sicre, M.-A., Jacob, J., Ezat, U., Rouse, S., Kissel, K., Eiriksson, J., Knudsen, K.-L., Jansen, E., and Turon, J.L.: Decadal variability of sea surface temperatures off North Iceland over the last 2000 yrs. *Earth Planet. Sci. Lett.*, 268, 137-142, 2008a.
- Sicre, M.-A., Khodri, M., Mignot, J., Eiriksson, J., Knudsen, K.-L., Ezat, U., Closset, I., Nogues, P., and Massé, G.: Sea surface temperature and sea ice variability in the subpolar North Atlantic from explosive volcanism of the late thirteenth century. *Geophys. Res. Lett.*, 40, 5526-5530, 2013.
- Sicre, M.-A., Yiou, P., Eiriksson, J., Ezat, U., Guimbaut, E., Dahhaoui, I., Knudsen, K.-L., Jansen, E., and Turon, J.-L.: A 4500-year reconstruction of sea surface temperature variability at decadal time-scales off North Iceland. *Quat. Sci. Rev.*, 27, 2041-2047, 2008b.
- Smith, L.M., Andrews, J.T., Castañeda, I.S., Kristjánsdóttir, G.B., Jennings, A.E., and Sveinbjörnsdóttir, Á.E.: Temperature reconstructions for SW and N Iceland waters over the last 10 cal ka based on  $\delta^{18}\text{O}$  records from planktic and benthic foraminifera. *Quat. Sci. Rev.*, 24, 1723-1740, 2005.
- Solignac, S., Giraudeau, J., and de Vernal, A.: Holocene sea surface conditions in the western North Atlantic: Spatial and temporal heterogeneities. *Paleoceanography*, 21, 1-6, 2006
- Stoner, J.S., Jennings, A., Kristjánsdóttir, G.B., Dunhill, G., Andrews, J.T., and Hardardóttir, J.: A paleomagnetic approach toward refining Holocene radiocarbon-based chronologies: Paleoceanographic records from the north Iceland (MD99-2269) and east Greenland (MD99-2322) margins. *Paleoceanography*, 22, 1-23, 2007.
- Xiao, X., Zhao, M., Knudsen, K.L., Sha, L., Eiriksson, J., Gudmundsdóttir, E., Jiang, H., and Guo, Z.: Deglacial and Holocene sea-ice variability north of Iceland and response to ocean circulation changes. *Earth Planet. Sci. Lett.*, 472, 14-24, 2017.
